# Supplementary material
Source: Springer Nature journal article supplement (https://www.springermedizin.de/resource/supplementary/12936_2007_530_MOESM1_ESM.pdf/9548204)
Supplement: MOESM1 [file 9548204]

- Tropical stratum
- Sub-desert stratum
- Highlands stratum
- Equatorial stratum

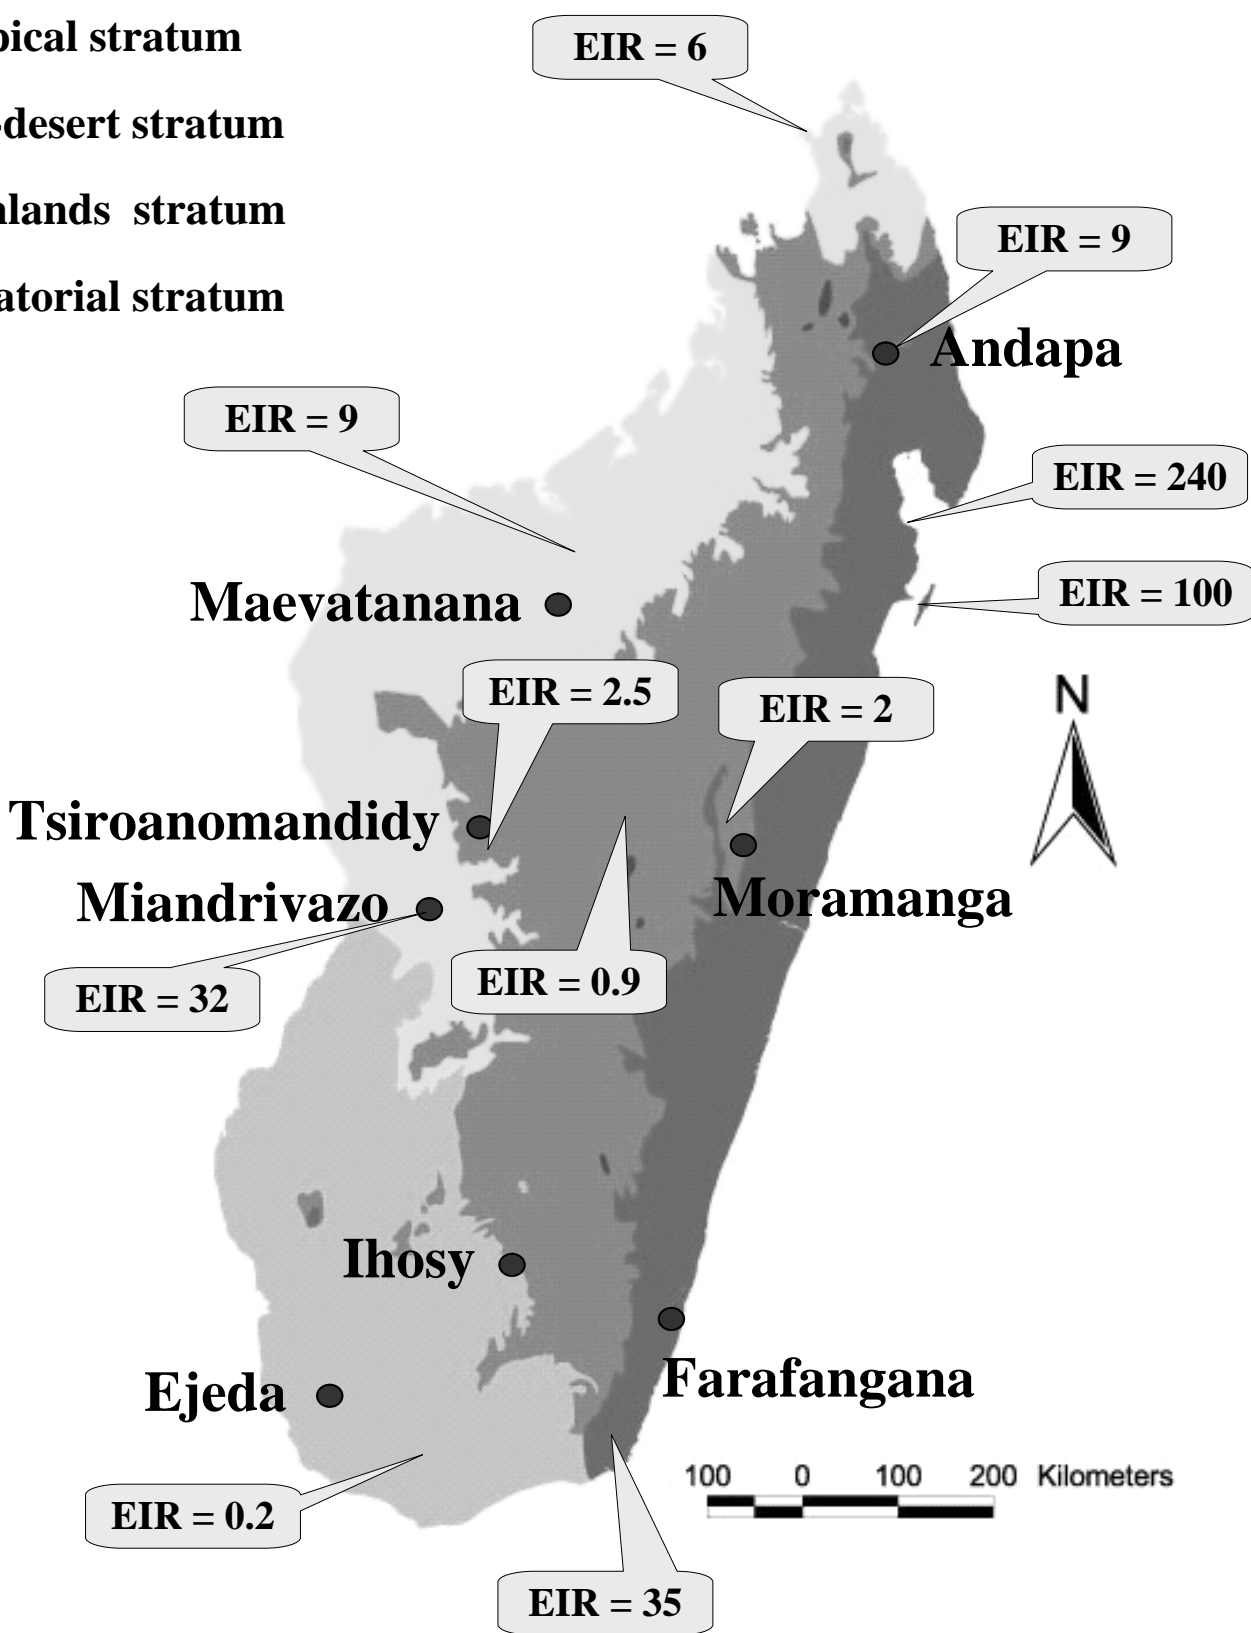

EIR, Entomological Inoculation Rate
